# Supplementary material
Source: PubMed Central journal article supplement (PMC3111069)
Supplement: NIHMS284655-supplement-01.pdf [file NIHMS284655-supplement-01.pdf]

## Supplementary webappendix

This webappendix formed part of the original submission and has been peer reviewed. We post it as supplied by the authors.

Supplement to: The PENPACT-1 (PENTA 9/PACTG 390) Study Team. First-line antiretroviral therapy with a protease inhibitor versus non-nucleoside reverse transcriptase inhibitor and switch at higher versus low viral load in HIV-infected children: an open-label, randomised phase 2/3 trial. *Lancet Infect Dis* 2011; published online Feb 1. DOI:10.1016/S1473-3099(10)70313-3.

**Table S1: Primary and Secondary Outcomes**

| <b>Primary Outcome</b>                                                                     |  | PI-1000              |  | PI-30000               |  | NNRTI-1000           |  | NNRTI-30000            |  |          |  |
|--------------------------------------------------------------------------------------------|--|----------------------|--|------------------------|--|----------------------|--|------------------------|--|----------|--|
|                                                                                            |  | (n=57)               |  | (n=61)                 |  | (n=60)               |  | (n=56)                 |  |          |  |
| Mean (SE) VL change from baseline to four years <sup>a</sup> (log <sub>10</sub> c/ml)      |  | -3.14 (0.13)         |  | -3.18 (0.13)           |  | -3.38 (0.13)         |  | -3.23 (0.14)           |  |          |  |
| <b>Secondary Outcomes</b>                                                                  |  |                      |  |                        |  |                      |  |                        |  |          |  |
|                                                                                            |  | (n=65)               |  | (n=65)                 |  | (n=67)               |  | (n=62)                 |  |          |  |
| VL <400c/ml at week 24 on first-line ART                                                   |  | 44 (68%)             |  | 51 (78%)               |  | 57 (85%)             |  | 46 (74%)               |  |          |  |
|                                                                                            |  | (n=54)               |  | (n=58)                 |  | (n=60)               |  | (n=54)                 |  |          |  |
| VL <400c/ml at four years <sup>b</sup>                                                     |  | 45 (83%)             |  | 47 (81%)               |  | 50 (83%)             |  | 43 (80%)               |  |          |  |
|                                                                                            |  | (n=66)               |  | (n=65)                 |  | (n=68)               |  | (n=64)                 |  |          |  |
| Continued VL suppression (never confirmed >400c/ml) on first-line ART                      |  | 32 (48%)             |  | 42 (65%)               |  | 40 (59%)             |  | 35 (55%)               |  |          |  |
| Failure of second-line ART (confirmed VL >30000c/ml or discontinuation of second-line ART) |  | 4 (6%)               |  | 6 (9%)                 |  | 7 (10%)              |  | 1 (2%)                 |  |          |  |
| Children experiencing grade 3/4 adverse events (non-HIV related)                           |  | 15 (23%)             |  | 13 (20%)               |  | 15 (22%)             |  | 17 (27%)               |  |          |  |
| Children experiencing new CDC stage C events                                               |  | 3 (5%)               |  | 3 (5%)                 |  | 1 (1%)               |  | 2 (3%)                 |  |          |  |
| Regimen switch                                                                             |  | 20 (30%)             |  | 8 (12%)                |  | 17 (25%)             |  | 15 (23%)               |  |          |  |
|                                                                                            |  | (n=20)               |  | (n=8)                  |  | (n=17)               |  | (n=15)                 |  |          |  |
| Median (IQR) VL at regimen switch (c/ml)                                                   |  | 7450<br>(1880,30362) |  | 35131<br>(2114, 66800) |  | 6258<br>(1380,19170) |  | 35712<br>(11800,72800) |  |          |  |
|                                                                                            |  | (n=65)               |  | (n=65)                 |  | (n=67)               |  | (n=62)                 |  |          |  |
| Mean (SE) CD4% increase from baseline to four years <sup>a</sup> (cells/mm <sup>3</sup> )  |  | 14.2 (1.2)           |  | 13.3 (1.1)             |  | 15.9 (1.1)           |  | 14.5 (1.2)             |  |          |  |
|                                                                                            |  | (n=61)               |  | (n=60)                 |  | (n=64)               |  | (n=61)                 |  |          |  |
| Major NNRTI mutations <sup>c</sup>                                                         |  | none                 |  | 55 (90%)               |  | 57 (95%)             |  | 49 (77%)               |  | 43 (70%) |  |
|                                                                                            |  | 1-2                  |  | 4 (7%)                 |  | 3 (5%)               |  | 14 (22%)               |  | 13 (21%) |  |
|                                                                                            |  | 3 or more            |  | 2 (3%)                 |  |                      |  | 1 (2%)                 |  | 5 (8%)   |  |
| Major PI mutations                                                                         |  | none                 |  | 52 (85%)               |  | 56 (93%)             |  | 62 (97%)               |  | 60 (98%) |  |
|                                                                                            |  | 1-2                  |  | 9 (15%)                |  | 4 (7%)               |  | 2 (3%)                 |  | 1 (2%)   |  |
| Major NRTI mutations <sup>d</sup>                                                          |  | none                 |  | 49 (80%)               |  | 51 (85%)             |  | 50 (78%)               |  | 42 (69%) |  |
|                                                                                            |  | 1-2                  |  | 9 (15%)                |  | 6 (10%)              |  | 14 (22%)               |  | 12 (20%) |  |
|                                                                                            |  | 3 or more            |  | 3 (5%)                 |  | 3 (5%)               |  |                        |  | 7 (11%)  |  |

<sup>a</sup> Four years was defined to be the mean of the measurements at weeks 192 and 204 (a single measurement was used if both were not available)

<sup>b</sup> Four years was defined to be the week 204 measurement.

<sup>c</sup> interaction p=0.02.

<sup>d</sup> interaction p=0.003.

VL = viral load, PI = protease inhibitor, NNRTI = non-nucleoside reverse transcriptase inhibitor, NRTI = nucleoside reverse transcriptase inhibitor

**Table S2: Adverse events**

| Grade 3/4 adverse events           | Total<br>(n=263) |             | PI<br>(n=131) |             | NNRTI<br>(n=132) |             | 1000<br>(n=134) |             | 30000<br>(n=129) |             |
|------------------------------------|------------------|-------------|---------------|-------------|------------------|-------------|-----------------|-------------|------------------|-------------|
| <b>Total (Episodes (children))</b> | <b>97</b>        | <b>(60)</b> | <b>39</b>     | <b>(28)</b> | <b>58</b>        | <b>(32)</b> | <b>47</b>       | <b>(30)</b> | <b>50</b>        | <b>(30)</b> |
| haematology/biochemistry           | 22               | (20)        | 16            | (14)        | 6                | (6)         | 13              | (12)        | 9                | (8)         |
| GI                                 | 21               | (14)        | 11            | (7)         | 10               | (7)         | 7               | (5)         | 14               | (9)         |
| infection/allergic reaction        | 26               | (21)        | 5             | (4)         | 21               | (17)        | 12              | (10)        | 14               | (11)        |
| ear/eye disorders                  | 4                | (3)         | 1             | (1)         | 3                | (2)         | 1               | (1)         | 3                | (2)         |
| nervous system                     | 13               | (10)        | 2             | (2)         | 11               | (8)         | 9               | (6)         | 4                | (4)         |
| airways                            | 3                | (2)         |               |             | 3                | (2)         | 2               | (1)         | 1                | (1)         |
| renal                              | 2                | (2)         | 2             | (2)         |                  |             |                 |             | 2                | (2)         |
| trauma                             | 5                | (5)         | 1             | (1)         | 4                | (4)         | 2               | (2)         | 3                | (3)         |
| reproductive health                | 1                | (1)         | 1             | (1)         |                  |             | 1               | (1)         |                  |             |
| <b>ART related*</b>                | <b>17</b>        | <b>(15)</b> | <b>10</b>     | <b>(8)</b>  | <b>7</b>         | <b>(7)</b>  | <b>6</b>        | <b>(6)</b>  | <b>11</b>        | <b>(9)</b>  |
| haematology/biochemistry           | 7                | (7)         | 4             | (4)         | 3                | (3)         | 2               | (2)         | 5                | (5)         |
| GI                                 | 4                | (4)         | 3             | (3)         | 1                | (1)         | 2               | (2)         | 2                | (2)         |
| infection/allergic reaction        | 4                | (4)         | 2             | (2)         | 2                | (2)         | 1               | (1)         | 3                | (3)         |
| nervous system                     | 2                | (2)         | 1             | (1)         | 1                | (1)         | 1               | (1)         | 1                | (1)         |
| <b>Serious adverse events</b>      |                  |             |               |             |                  |             |                 |             |                  |             |
| <b>Total (Episodes (children))</b> | <b>69</b>        | <b>(48)</b> | <b>29</b>     | <b>(23)</b> | <b>40</b>        | <b>(25)</b> | <b>24</b>       | <b>(19)</b> | <b>45</b>        | <b>(29)</b> |
| haematology/biochemistry           | 10               | (8)         | 6             | (5)         | 4                | (3)         | 3               | (3)         | 7                | (5)         |
| GI                                 | 10               | (7)         | 4             | (3)         | 6                | (4)         | 4               | (3)         | 6                | (4)         |
| infection/allergic reaction        | 30               | (25)        | 14            | (12)        | 16               | (13)        | 8               | (8)         | 22               | (17)        |
| ear/eye disorders                  | 2                | (2)         | 1             | (1)         | 1                | (1)         | 1               | (1)         | 1                | (1)         |
| nervous system                     | 9                | (7)         |               |             | 9                | (7)         | 5               | (4)         | 4                | (3)         |
| airways                            | 3                | (2)         |               |             | 3                | (2)         | 2               | (1)         | 1                | (1)         |
| renal                              | 1                | (1)         | 1             | (1)         |                  |             |                 |             | 1                | (1)         |
| trauma                             | 2                | (2)         | 1             | (1)         | 1                | (1)         |                 |             | 2                | (2)         |
| reproductive health                | 2                | (2)         | 2             | (2)         |                  |             | 1               | (1)         | 1                | (1)         |
| <b>ART related*</b>                | <b>17</b>        | <b>(15)</b> | <b>10</b>     | <b>(8)</b>  | <b>7</b>         | <b>(7)</b>  | <b>5</b>        | <b>(5)</b>  | <b>12</b>        | <b>(10)</b> |
| haematology/biochemistry           | 6                | (6)         | 4             | (4)         | 2                | (2)         | 1               | (1)         | 5                | (5)         |
| GI                                 | 2                | (2)         | 2             | (2)         |                  |             | 1               | (1)         | 1                | (1)         |
| infection/allergic reaction        | 8                | (8)         | 4             | (4)         | 4                | (4)         | 2               | (2)         | 6                | (6)         |
| nervous system                     | 1                | (1)         |               |             | 1                | (1)         | 1               | (1)         |                  |             |

\*reported as possibly, probably or definitely ART related

Events were coded using MedDRA (Version 12.0), and were grouped by primary System Organ Class as follows: **haematology/biochemistry:** Blood and lymphatic system disorders\*\*; Investigations; Metabolism and nutrition disorders; **GI:** Gastrointestinal disorders; Hepatobiliary disorders; **infection/allergic reaction:** Immune system disorders; Infections and infestations; Skin and subcutaneous tissue disorders; Vascular disorders; General disorders and administration site conditions; **ear/eye disorders:** Ear and labyrinth disorders; Eye disorders; **nervous system:** Musculoskeletal and connective tissue disorders; Nervous system disorders; Psychiatric disorders; Progressive external ophthalmoplegia (preferred term); **airways:** Respiratory, thoracic and mediastinal disorders; **renal:** Renal and urinary disorders; **trauma:** Injury, poisoning and procedural complications; **reproductive health:** Pregnancy, puerperium and perinatal conditions; Reproductive system and breast disorders

\*\* all anaemia, neutropenia or thrombocytopenia

## Acknowledgements

### The PENPACT-1 (PENTA 9 / PACTG 390) Study Team

#### Writing Committee (alphabetical)

Abdel Babiker, Hannah Castro (nee Green), Alexandra Compagnucci, Susan Fiscus, Carlo Giaquinto, Diana M Gibb, Lynda Harper, Linda Harrison, Michael Hughes, Ross McKinney, Ann Melvin, Lynne Mofenson, Yacine Saidi, M Elizabeth Smith, Gareth Tudor-Williams, A Sarah Walker.

#### PENPACT1 Protocol Team

**PACTG/IMPAACT/NICHD:** P Brouwers, D Costello, E Ferguson, S Fiscus, J Hodge, M Hughes, C Jennings, A Melvin (Co-Chair), R McKinney (Co-Chair), L Mofenson, M Warshaw, ME Smith, S Spector, E Stiehm, M Toye, R Yogev.

**PENTA:** JP Aboulker, A Babiker, H Castro, A Compagnucci, A De Rossi, C Giaquinto, J Darbyshire, M Debré, DM Gibb, L Harper, L Harrison, N Klein, D Pillay, Y Saidi, G Tudor-Williams (Co-Chair), AS Walker.

**Data and Safety Monitoring Board:** B Brody, C Hill, P Lepage, J Modlin, A Poziak, M Rein (Chair 2002- 2003), M Robb (Chair 2004 – 2009), T Fleming, S Vella, KM Kim.

#### Clinical Sites (L = lab, P = pharmacy)

**Argentina:** Hospital de Pediatria Dr JP Garrahan, Buenos Aires: R Bologna, D Mecikovsky, N Pineda, L Sen (L), A Mangano (L), S Marino (L), C Galvez (L); Laboratorio Fundai: G Deluchi (L).

**Austria:** Universitätsklinik für Kinder und Jugendheilkunde, Graz: B Zöhrer, W Zenz, E. Daghofer, K Pfurtscheller, B Pabst (L).

**Bahamas:** Princess Margaret Hospital: MP Gomez, P McNeil, M Jervis, I Whyms, D Kwolfe, S Scott (P).

**Brazil:** University of Sao Paulo at Ribeirao Preto: MM Mussi-Pinhata, ML Issac, MC Cervi, BVM Negrini, TC Matsubara, C BSS de Souza (L), JC Gabaldi (P); Institute of Pediatrics (IPPMG), Federal University of Rio de Janeiro: RH Oliveira, MC Sapia, T Abreu, L Evangelista, A Pala, I Fernandes, I Farias, M de F Melo (L), H Carreira (P), LM Lira (P); Instituto de Infectologia Emilio Ribas, Sao Paulo: M della Negra, W Queiroz, YC Lian; DP Pacola; Fleury Laboratories; Federal University of Minas Gerais, Belo Horizonte: J Pinto, F Ferreira, F Kakehasi, L Martins, A Diniz, V Lobato, M Diniz, C Hill (L), S Cleto (L), S Costa (P), J Romeiro (P).

**France:** Hôpital d'enfants Armand Trousseau, Paris: C Dollfus, MD Tabone, MF Courcoux, G Vaudre A Dehée (L), A Schnuriger (L), N Le Gueyades (P), C De Bortoli (P); CHU Hôtel Dieu, Nantes: F Méchinaud, V Reliquet, J Arias (L), A Rodallec (L), E André (L), I Falconi (P), A Le Pelletier (P); Hôpital de l'Archet II, Nice, F Monpoux, J Cottalorda (L), S Mellul (L); Hôpital Jean Verdier, Bondy: E Lachassinne; Laboratoire de virologie-Hôpital Necker Enfants Malades, Paris: J Galimand (L), C Rouzioux (L), ML Chaix (L), Z Benabadi (P), M Pourrat (P); Hôpital Cochin Port-Royal- Saint Vincent de Paul, Paris: G Firtion, D Rivaux, M Denon, N Boudjoudi, F Nganzali, A Krivine (L), JF Méritet (L), G Delommois (L), C Norgeux (L), C Guérin (P); Hôpital Louis Mourier, Colombes: C Floch, L Marty, H Hichou (L), V Tournier (P); Hôpital Robert Debré, Paris, A Faye, I Le Moal, M Sellier (P), L Dehache (P); Laboratoire de virologie-Hôpital Bichat Claude Bernard-Paris: F Damond (L), J Leleu (L), D Beniken (L), G Alexandre-Castor (L)

**Germany:** Universitäts - Kinderklinik Düsseldorf: J Neubert, T Niehues, HJ Laws, K Huck, S Gudowius, K Siepermann, (H Loeffler), S Bellert(L), A Ortwin (L); Universitäts - Kinderkliniken, Munich: G Notheis, U Wintergerst, F Hoffman, (A Werthmann, S Seyboldt, L Schneider, B Bucholz); Charité – Medizinische Fakultät der Humboldt-Universität zu Berlin: C Feiterna-Sperling, C Peiser, R Nickel, T Schmitz, T Piening, C Müller (L); Kinder- und Jugendklinik, Universität Rostock: G Warncke, M Wigger, R Neubauer.

**Ireland:** Our Lady's Children's Hospital Crumlin, Dublin: K Butler, AL Chong, T Boulger, A Menon, M O'Connell, L Barrett, A Rochford, M Goode, E Hayes, S McDonagh, A Walsh, A Doyle, J Fanning (P), M O'Connor (P), M Byrne (L), N O'Sullivan (L), E Hyland (L).

**Italy:** Clinica Pediatrica, Ospedale L Sacco, Milan: V Giacommet, A Viganò, I Colombo, D Trabattini (L), A Berzi (L); Clinica Pediatrica, Università di Brescia: R Badolato, F Schumacher, V Bennato, M Brusati, A Sorlini, E Spinelli, M Filisetti, C Bertulli; Clinica Pediatrica, Università di Padova: O Rampon, C Giaquinto, M Zanchetta (L); Ospedale S. Chiara, Trento: A Mazza, G Stringari, G Rossetti (L); Ospedale del Bambino Gesù, Rome: S Bernardi, A Martino, G Castelli Gattinara, P Palma, G Pontrelli, H Tchidjou, A.Furcas, C. Frillici, A. Mazzei, A Zoccano (P), C Concato (L).

**Romania:** Spitalul Clinic de Boli Infectioase Victor Babes, Bucharest: D Duiculescu, C Oprea, G Tardei (L), F Abaab (P); Institutul de Boli Infectioase Matei Bals, Bucharest: M Mardarescu, R Draghicesoiu, D Otelea (L), L Alecsandru (P); Clinic Municipal, Constanta: R Matusa, S Rugina, M Ilie, Silvia Netescu (P). Clinical monitors: C Florea, E Voicu, D Poalelungi, C Belmega, L Vladau, A Chiriac

**Spain:** Hospital Materno-Infantil 12 de Octubre, Madrid: JT Ramos Amador, MI Gonzalez Tomé, P Rojo Conejo, M Fernandez, R Delgado Garcia (L), JM Ferrari (P); Institute de Salud Carlos III, Madrid: M Garcia Lopez, MJ Mellado Peña, P Martin Fontelos, I Jimenez Nacher (P); Biobanco Gregorio Marañón, Madrid: MA Muñoz Fernandez (L), JL Jimenez (L), A García Torre (L); clinical monitors: M Penin, R Pineiro Perez, I Garcia Mellado.

**UK:** Bristol Royal Children's Hospital: A Finn, M LaJeunesse, E Hutchison, J Usher (L), L Ball (P), M Dunn (P); St. George's Healthcare NHS Trust, London: M Sharland, K Doerholt, S Storey, S Donaghy, R Chakraborty, C Wells (P), K Buckberry (P), P Rice (P); University Hospital of North Staffordshire: P McMaster, P Butler, C Farmer (L), J Shenton (P), H Haley (P), J Orendi (L), University Hospital Lewisham: J Stroobant, L Navarante, P Archer, C Mazhude, D Scott, R O'Connell, J Wong (L), G Boddy (P); Sheffield Children's Hospital: F Shackley, R Lakshman, J Hobbs, G Ball (L), G Kudesia (L), J Bane (P), D Painter (P); Ealing Hospital NHS Trust: K Sloper, V Shah, A Cheng (P), A Aali (L); King's College Hospital, London: C Ball, S Hawkins, D Nayagam, A Waters, S Doshi (P); Newham University Hospital: S Liebeschuetz, B Sodiende, D Shingadia, S Wong, J Swan (P), Z Shah (P); Royal Devon and Exeter Hospital: A Collinson,

C Hayes, J King (L), K O'Connor (L); Imperial College Healthcare NHS Trust, London: G Tudor-Williams, H Lyall, K Fidler, S Walters, C Foster, D Hamadache, C Newbould, C Monrose, S Campbell, S Yeung, J Cohen, N Martinez-Allier, D Melvin, J Dodge, S Welch, (G Tatum, A Gordon), S Kaye (L), D Muir (L), D Patel (P); Great Ormond Street Hospital: V Novelli, D Gibb, D Shingadia, K Moshal, J Lambert, N Klein, J Flynn, L Farrelly, M Clapson, L Spencer, M Depala (P); Institute of Child Health, London: M Jacobsen (L); John Radcliffe Hospital, Oxford: S Segal, A Pollard, D Kelly, S Yeadon, B Ohene-Kena Y Peng (L), T Dong (L), Y Peng (L), K Jeffries (L), M Snelling (P), Nottingham University Hospitals: A Smyth, J Smith; Chelsea and Westminster Hospital, London: B Ward; Mortimer Market Centre, London: E Jungmann; Doncaster Royal Infirmary: C Ryan, K Swaby; Health Protection Agency, London: A Buckton (L); Health Protection Agency, Birmingham: E Smit (L).

**USA:** Harlem Hospital Center: EJ Abrams, S Champion, AD Fernandez, D Calo, L Garroville, K Swaminathan, T Alford, M Frere, Columbia University laboratories, J Navarra (P, Town Total Health); NYU School of Medicine: W Borkowsky, S Deygo, T Hastings, S Akleh, T Ilmet (L); Seattle Children's Hospital: A Melvin, K Mohan, G Bowen (Additional support by NIH Grant UL1 RR025014); University of South Florida: PJ Emmanuel, J Lujan-Zimmerman, C Rodriguez, S Johnson, A Marion, C Graisbury, D Casey, G Lewis; All Children's Hospital laboratories; Oregon Health and Science University: J Guzman-Cottrill, R Croteau; San Juan City Hospital: M Acevedo-Flores, M Gonzalez, L Angeli; L Fabregas, Lab 053, P Valentin (P); SUNY- Upstate Medical University-Syracuse: L Weiner, KA Contello, W Holz, M Butler; SUNY, Health Science Center at Stonybrook: S Nachman, MA. Kelly, DM. Ferraro, UNC Retrovirology Lab; Howard University Hospital: S Rana, C Reed, E Yeagley, A Malheiro, J Roa; LAC and USC Medical Center: M Neely, A Kovacs, L Spencer, J Homans, Y Rodriguez Lozano, Maternal Child Virology Research Laboratory, Investigational Drug Service; South Florida Childrens Diagnostic & Treatment Center: A Puga, G Talero, R Sellers; Broward General Medical Center, University of Miami (L); University College of Florida College of Medicine- Gainesville: R Lawrence; University of Rochester Pediatrics: GA. Weinberg, B Murante, S Laverty; Miller Children's Hospital Long Beach: A Deveikis, J Batra, T Chen, D Michalik, J Deville, K Elkins, S Marks, J Jackson Alvarez, J Palm, I Fineanganof (L), M Keuth (L), L Deveikis (L), W Tomosada (P); Tulane University New Orleans: R Van Dyke, T Alchediak, M Silio, C Borne, S Bradford, S Eloby-Childress (L), K Nguyen (P); University of Florida/Jacksonville: MH. Rathore, A Alvarez; A Mirza, S Mahmoudi, M Burke; University of Puerto Rico: IL Febo, L Lugo, R Santos; Children's Hospital Los Angeles: JA Church, T Dunaway, C Rodier; St. Jude/UTHSC: P Flynn, N Patel, S DiScenza, M Donohoe; WNE Maternal Pediatric Adolescent AIDS: K Luzuriaga, D Picard; Texas Children's Hospital: M Kline, ME Paul, WT Shearer, C McMullen-Jackson; Children's Memorial Hospital, Chicago: R Yogev, E Chadwick, E Cagwin, K Kabat; New Jersey Medical School: A Dieudonne, P Palumbo, J Johnson; Robert Wood Johnson Medical School, New Brunswick : S Gaur, L Cerracchio; Columbia IMPAACT: M Foca, A Jurgrau, S Vasquez Bonilla, G Silva; Babies' Hospital, Columbia/Presbyterian Medical Center, New York (A Gershon); University of Massachusetts Medical Center, Worcester (J Sullivan); UCLA Medical Center, Los Angeles (Y Bryson); Children's Hospital, Seattle: L Frenkel; UNC-Chapel Hill Virology Lab: S Fiscus (L), J Nelson (L).

#### **Trials Units/Support**

**INSERM SC10 Paris:** JP Aboulker, A Compagnucci, G Hadjou, S Léonardo, Y Riault, Y Saïdi

**MRC Clinical Trials Unit, UK:** A Babiker, L Buck, JH Darbyshire, L Farrelly, S Forcat, DM Gibb, H Castro, L Harper, L Harrison, J Horton, D Johnson, S Moore, C Taylor, AS Walker.

**Westat/NICHD:** D Collins, S Buskirk, P Kamara, C Nesel, M Johnson, A Ferreira

**Frontier Science:** J Hodge, J Tutko, H Sprenger

**IMPAACT:** M. Hughes, M. Warshaw, P. Britto, C. Powell

**NIAID:** R DerSimonian, E Handelsman

**PENTA Steering Committee:** JP Aboulker, J Ananworanich, A Babiker, E Belfrage, S Bernardi, S Blanche, AB Bohlin, R Bologna, D Burger, K Butler, G Castelli-Gattinara, H Castro, P Clayden, A Compagnucci, JH Darbyshire, M Debré, R De Groot, M Della Negra, D Duiculescu, A Faye, C Giaquinto (Chair), DM Gibb, I Grosch-Wörner, M Hainault, L Harper, N Klein, M Lallemand, J Levy, H Lyall, M Marczynska, M Mardarescu, MJ Mellado Pena, D Nadal, T Niehues, C Peckham, D Pillay, JT Ramos Amador, L Rosado, R Rosso (deceased), C Rudin, Y Saïdi, H Scherpbier, M Sharland, M Stevanovic, C Thorne, PA Tovo, G Tudor-Williams, AS Walker, S Welch, U Wintergerst, N Valerius.
